# QUANTITATIVE TRAIT EVOLUTION WITH ARBITRARY MUTATIONAL MODELS

JOSHUA G. SCHRAIBER AND MICHAEL J. LANDIS

**ABSTRACT.** When models of quantitative genetic variation are built from population genetic first principles, several assumptions are often made. One of the most important assumptions is that traits are controlled by many genes of small effect. This leads to a prediction of a Gaussian trait distribution in the population, via the Central Limit Theorem. Since these biological assumptions are often unknown or untrue, we characterized how finite numbers of loci or large mutational effects can impact the sampling distribution of a quantitative trait. To do so, we developed a neutral coalescent-based framework, allowing us to experiment freely with the number of loci and the underlying mutational model. Through both analytical theory and simulation we found the normality assumption was highly sensitive to the details of the mutational process, with the greatest discrepancies arising when the number of loci was small or the mutational kernel was heavy-tailed. In particular, fat-tailed mutational kernels result in multimodal sampling distributions for any number of loci. Since selection models and robust neutral models may produce qualitatively similar sampling distributions, we advise extra caution should be taken when interpreting model-based results for poorly understood systems of quantitative traits.

## 1. INTRODUCTION

Questions about the distribution of traits that vary continuously in populations were critical in motivating early evolutionary biologists. The earliest studies of quantitative trait variation relied on phenomenological models, because the underlying nature of heritable variation was not yet well understood (Galton, 1883, 1889; Pearson, 1894, 1895). Despite the rediscovery of the work of Mendel (1866), researchers studying continuous variation in natural populations were initially skeptical that the Mendel's laws could explain what they observed (Weldon, 1902; Pearson, 1904). These views were reconciled when Fisher (1918) showed that the observations of correlation and variation between phenotypes in natural populations could be explained by a model in which many genes made small contributions to the phenotype of an individual.

The insights of Fisher (1918) made it possible to build models of quantitative trait evolution from population genetic first principles. Early work focused primarily on the interplay between mutation and natural selection in the maintenance of quantitative genetic variation in natural populations, while typically ignoring the effects of genetic drift (Fisher, 1930; Haldane, 1954; Latter, 1960; Kimura, 1965).

---

*Date:* Started on February 25, 2014. Completed on August 27, 2014.

17 However, genetic drift plays an important role in shaping variation in natural popu-  
18 lations. While earlier work assumed that a finite number of alleles control quantitative  
19 genetic variation (e.g. Latter (1970)), Lande (1976) used the continuum-of-alleles model  
20 proposed by Kimura (1965) to model the impact of genetic drift on differentiation within  
21 and between populations. A key assumption of Lande’s models is that the additive genetic  
22 variance in a trait is constant over time. In fact, in finite populations the genetic variance  
23 itself is random; at equilibrium, there are still stochastic fluctuations around the determin-  
24 istic value assumed by Lande, even if none of the underlying genetic architecture changes  
25 (Bürger and Lande, 1994).

26 Several later papers explored more detailed models to understand how genetic variance  
27 changes through time due to the joint effects of mutation and drift (e.g. Chakraborty  
28 and Nei (1982)). Lynch and Hill (1986) undertook an extremely thorough analysis of  
29 the evolution of neutral quantitative traits. They analyzed the moments (e.g. mean and  
30 variance) of trait distributions that arise due to mutation and genetic drift and provided  
31 several quantities that can be used to interpret variation within and between species and  
32 analyze mutation accumulation experiments.

33 Much of this earlier work has made several simplifying assumptions about the distri-  
34 bution of mutational effects and the genetic architecture of the traits in question. For  
35 instance, Lynch and Hill (1986), despite analyzing quite general models of dominance and  
36 epistasis, ignored the impact of heavy tailed or skewed mutational effects. While, in many  
37 cases, such properties of the mutational effect distribution are not expected to have an  
38 impact if a large number of genes determine the phenotype in question, it is unknown  
39 what impact they may have when only a small number of genes determine the genetic  
40 architecture of the trait. Moreover, when mutational effects display “power-law” or “fat-  
41 tailed” behavior, the impact of the details of the mutational effects may persist even in the  
42 so-called infinitesimal limit of a large number of loci with small effects. Finally, mutation  
43 accumulation experiments have produced skewed and/or leptokurtic samples of quantita-  
44 tive traits (Mackay et al., 1992), which is a direct motivation to relax assumptions on the  
45 mutational effects distribution.

46 Such deviations that stem from the violations of common modeling assumptions have the  
47 potential to influence our understanding of variation in natural populations. For instance,  
48 leptokurtic trait distributions may be a signal of some kind of diversifying selection (Kopp  
49 and Hermisson, 2006) but are also possible under neutrality when the number of loci  
50 governing a trait is small. Similarly, multimodal trait distributions may reflect some kind  
51 of underlying selective process (Doebeli et al., 2007) but may also be due to rare mutations  
52 of large effect.

53 We have two primary goals in this work. Primarily, we want to assess the impact of  
54 violations of common assumptions on properties of the sampling distribution of a quan-  
55 titative trait (e.g. variance, kurtosis, modality). Secondly, we believe that the formalism  
56 that we present here can be useful in a variety of situations in quantitative trait evolution,  
57 particularly in the development of robust null models for detecting selection at microevolu-  
58 tionary time scales. To this end, we introduce a novel framework for computing sampling  
59 distributions of quantitative traits. Our framework builds upon the coalescent approach of

60 Whitlock (1999), but allows us to recover the full sampling distribution, instead of merely  
61 its moments.

62 First, we outline the biological model and explain how we can compute quantities of  
63 interest using a formalism based on characteristic functions. We then use this approach to  
64 compute the sample central moments. While much previous work focuses on only the first  
65 two central moments (mean and variance), we are able to compute arbitrarily high central  
66 moments, which are related to properties such as skewness and kurtosis. By doing so, we  
67 are able to determine the regime in which the details of the mutational effect distribution  
68 are visible in a sample from a natural population. Finally, we explore the convergence to  
69 the infinitesimal limit and find that when “fat-tailed” effects are present, traditional theory  
70 based on the assumption of normality can lead to misleading predictions about phenotypic  
71 variation.

72

## 2. MODEL

73 The mechanistic model we construct has three major components: a coalescent process,  
74 a genetic mutational process that acts upon the controlling quantitative trait loci, and  
75 a mutational kernel that samples quantitative trait effect sizes. Together these processes  
76 generate the quantitative traits sampled from the study population while explicitly mod-  
77 eling their shared genetic ancestry. Although we opt for simple model components during  
78 this exposition, the model generally supports more realistic and complex extensions, such  
79 as population structure and epistasis.

80 We assume that we sample  $n$  haploid individuals from a randomly mating population  
81 of size  $N$ . Initially, consider a trait governed by a single locus and we will later extend  
82 the theory to traits governed by multiple loci. Let  $\mu$  be the mutation rate per generation  
83 at the locus, and  $\theta = 2N\mu$  be the coalescent-scaled mutation rate. We model mutation  
84 as a process by which a new mutant adds an independent and identically distributed  
85 random effect to the ancestral state. Note that when the distribution of random effects is  
86 continuous, this corresponds to the Kimura (1965) continuum of alleles model. However,  
87 it is also possible for the effect distribution to be discrete, similar to the discrete model of  
88 Chakraborty and Nei (1982). While this model does not capture the impact of a biallelic  
89 locus with exactly two effects, the following theory could easily be modified to analyze that  
90 case.

91

[Figure 1 goes here]

92 Figure 1 shows one realization of both the coalescent and mutational processes for a  
93 sample of size 5. Given the phenotype at the root of the tree and the locations and effects  
94 of each mutation on the tree, the phenotypes at the tips are determined by adding mutant  
95 effects from the root to tip. To specify the root, we can assume without loss of generality  
96 that the ancestral phenotype for the entire population has a value 0 (this is similar to  
97 the common assumption in quantitative genetics literature that the ancestral state at each  
98 locus can be assigned a value of 0).

99 This mutational process can be described as a compound Poisson process (see also  
100 Khaitovich et al. (2005b); Chaix et al. (2008); Landis et al. (2013) for compound Pois-  
101 son processes in a phylogenetic context). To ensure that this paper is self contained, we  
102 briefly review relevant facts about compound Poisson processes in the Appendix.

103 In the following, we ignore the impact of non-genetic variation and focus on the breeding  
104 value of individuals, i.e. the average phenotype of an individual harboring a given set of  
105 mutations.

106

### 3. RESULTS

107 **3.1. Computing the characteristic function of a sample.** In many analyses, the  
108 object of interest is the joint probability of the data. If we let  $\mathbf{X} = (X_1, X_2, \dots, X_n)$  be  
109 the vector representing the quantitative traits observed in a sample of  $n$  individuals, we  
110 denote the joint probability of the data as  $p(x_1, x_2, \dots, x_n)$ . Note that, in general,  $X_i$  and  
111  $X_j$  are correlated due to shared ancestry, and that  $p$  must be computed by integrating over  
112 all mutational histories consistent with the data. Hence, computing  $p$  directly is extremely  
113 difficult.

Instead, we compute the characteristic function of  $\mathbf{X}$ . For a one-dimensional random  
variable,  $X$ , the characteristic function is defined as  $\mathbb{E}(e^{ikX})$  where  $i$  is the imaginary unit,  
 $k$  is a dummy variable. Generalizing this definition to an  $n$ -dimensional random variable,  
we are interested in computing

$$\begin{aligned}\lambda_n(\mathbf{k}) &= \mathbb{E}(e^{i\mathbf{k}^T \mathbf{X}}) \\ &= \mathbb{E}(e^{i(k_1 X_1 + k_2 X_2 + \dots + k_n X_n)})\end{aligned}$$

114 where  $\mathbf{k} = (k_1, k_2, \dots, k_n)$  is a vector of dummy variables. Like a probability density  
115 function, the characteristic function of  $\mathbf{X}$  contains all the information about the distribution  
116 of  $\mathbf{X}$ . Moreover, computing moments of  $\mathbf{X}$  is reduced to calculating derivatives of the  
117 characteristic function, which will prove useful in the following.

118 We calculate this formula in two parts. First, we compute a recursive formula for  $\phi_n$ ,  
119 the characteristic function given that ancestral phenotype of the *sample* is equal to 0.  
120 Then, we compute  $\rho_n$ , the characteristic function of the ancestral phenotype of the sample,  
121 assuming that the characteristic function of the *population* is equal to 0. As we show in the  
122 Appendix, we can then multiply these characteristic functions to obtain the characteristic  
123 function of  $\mathbf{X}$ .

124 We use a backward-forward argument to compute the recursive formula, first condi-  
125 tioning on the state when the first pair of lineages coalesce (backward in time) and then  
126 integrating (forward in time) to obtain the characteristic function for a sample of size  $n$ ,  
127  $\phi_n$ . This results in

$$(1) \quad \phi_n(\mathbf{k}) = \frac{2}{n(n-1) - \theta(\sum_{u=1}^n \psi(k_u) - n)} \sum_{u < v} \phi_{n-1}(\mathbf{k}^{(u,v)})$$

128 where  $\mathbf{k}^{(u,v)}$  is the vector of length  $n-1$  made by removing  $k_u$  and  $k_v$  and adding  $k_u + k_v$   
129 to the vector of dummy variables.

130 This equation has a straight-forward interpretation. The characteristic function for a  
131 sample of size  $n$ ,  $\phi_n$ , is simply the characteristic function for a sample of size  $n - 1$ ,  $\phi_{n-1}$ ,  
132 averaged over all possible pairs that could coalesce first, multiplied by the characteristic  
133 function for the amount of trait change that occurs more recently than the first coalescent.  
134 The multiplication comes from the fact that the characteristic function of a sum of inde-  
135 pendent random variables is the product of the characteristic functions of those random  
136 variables. We prove this result in the Appendix (Section 5.3).

137 In the Appendix (Section 5.4), we also show that the characteristic function for the  
138 phenotype at the root of the sample is

$$(2) \quad \rho_n(k) = n!(n-1) \sum_{u=1}^{\infty} \prod_{v=2}^u \frac{v(v-1)}{v(v-1) - \theta(\psi(k) - 1)} \frac{u!}{(n+u)!}.$$

139 Intuitively, this equation arises by conditioning on whether  $u$  lineages are left in the *popu-*  
140 *lation* when the sample reaches its common ancestor and then averaging over the (random)  
141 time between when the individuals in the sample coalesce and when everyone in the pop-  
142 ulation coalesces.

143 Hence, the characteristic function for a sample of size  $n$  is

$$\lambda_n(\mathbf{k}) = \rho_n(k_1 + k_2 + \dots + k_n) \phi_n(\mathbf{k}).$$

144 **3.2. Sampling traits controlled by a small number of loci.** It is common practice  
145 in both theoretical and applied quantitative genetics to summarize information about the  
146 phenotypic distribution within a population by computing central moments. However, care  
147 must be taken when interpreting theoretical predictions about central moments estimated  
148 from a sample. This is because the phenotypes in the sample are not independent, but  
149 instead correlated due to their shared genealogical history. Hence, in any *particular* pop-  
150 ulation, an estimate of a central moment may deviate from its expected value, even as the  
151 number of individuals sampled grows to infinity (Aldous, 1985).

With this caveat in mind, we computed the first four expected central moments for a  
sample of phenotypes taken from this model (see Appendix for details). They are

$$\begin{aligned} \mathbb{E}(h_2) &= \frac{1}{2} \theta L m_2 \\ \mathbb{E}(h_3) &= \frac{1}{6} \theta L m_3 \\ \mathbb{E}(h_4) &= \frac{3}{4} \theta^2 L^2 m_2^2 + \frac{1}{4} \theta L (2\theta m_2^2 + m_4), \end{aligned}$$

152 where  $h_k$  is the unique minimum variance unbiased estimator of the  $k$ th central moment,  
153  $m_k$  is the  $k$ th moment of the mutational effect distribution and  $L$  is the number of loci  
154 that influence the trait.

155 These equations reveal that it may be possible to construct method-of-moments estima-  
156 tors for the moments of the mutation effect distribution and/or the number of loci that  
157 govern a trait.

158 **3.3. “Infinitesimal” limits for large numbers of loci.** Many traits are assumed to be  
159 governed by a large number of loci, each individually of small effect. This is known as an  
160 infinitesimal model (Falconer and Mackay, 1996). Typically, the sampling distribution in  
161 the infinitesimal limit is assumed to be Gaussian, by appealing to the central limit theorem.  
162 Here, we find that under certain circumstances traits may not be normally distributed, even  
163 in the limit.

To obtain a non-trivial limit, we must assume that as the number of loci controlling the trait increases, the effect of each individual locus decreases. Then, computing the characteristic function for a trait governed by a large number of independent loci is simple due to the fact the characteristic function of the sum of independent random variables is the product of their characteristic functions. Thus, assuming that each locus has the same effect distribution (this assumption can be relaxed relatively easily) the characteristic function of the limit distribution is given by

$$\begin{aligned}\Lambda_n(\mathbf{k}) &= \lim_{L \rightarrow \infty} \lambda_n(\mathbf{k})^L \\ &= \lim_{L \rightarrow \infty} \rho_n(k_1 + k_2 + \dots + k_n)^L \phi_n(\mathbf{k})^L \\ &= R_n(k_1 + k_2 + \dots + k_n) \Phi_n(\mathbf{k}).\end{aligned}$$

164 In the Appendix, we show that mutation effect distributions with power law behavior  
165 instead converge to a limiting *stable* distribution. A random variable  $X$  is said to have a  
166 power law distribution if  $P(X > x) \sim \kappa x^{-\alpha}$  for large  $x$ , some  $\kappa > 0$  and some  $\alpha \in [0, 2)$ . In  
167 this limit, individuals with shared genealogy may still have highly correlated phenotypes,  
168 due to rare mutations of large effect.

On the other hand, all mutation effect distributions without power law behavior converge to a Gaussian limit, due to the central limit theorem. In the Appendix, we show that samples taken from a population in this limit can be represented as a sample from a normal distribution with a random mean. In particular,

$$\begin{aligned}X_i &\stackrel{\text{i.i.d.}}{\sim} \mathcal{N}\left(M, \frac{1}{2}\theta\sigma^2\right) \\ M &\sim \mathcal{N}\left(0, \frac{1}{2}\theta\sigma^2\right),\end{aligned}$$

169 where  $\mathcal{N}(m, s^2)$  represents a normal distribution with mean  $m$  and variance  $s^2$ .

170 **3.4. Simulation.** We simulated data to verify our analytical results and obtain some in-  
171 sight into the nature of the stable limiting distribution that arises for power law mutational  
172 effects. We first wanted to confirm that the trait distributions converge to univariate Gauss-  
173 ian limiting distributions as  $n \rightarrow \infty$  and  $L \rightarrow \infty$  when mutational kernels are not fat-tailed.  
174 To explore how the moments of the sampling distribution change with respect to  $n$ ,  $L$ , and  
175 the mutational kernel, we asked for which values of  $L$  do the moments of the various muta-  
176 tional kernels leave a signature in the sampled quantitative traits. Finally, we conjectured  
177 that fat-tailed mutation kernels result in trait distributions that remain multimodal as  
178  $L \rightarrow \infty$ , which we verified by simulation rather than by mathematical proof.

179 For these simulation studies, we selected four mutational kernels: (1) the symmetric  
180 normal distribution for its simplicity, (2) the Laplace distribution because it is heavier-  
181 tailed (or more leptokurtic) than the normal distribution yet has finite variance, (3) the  
182 skew-normal distribution for its skewness parameter and tractability, and (4) the symmet-  
183 ric  $\alpha$ -stable distribution because of its power-law behavior. To ensure that simulations of  
184 different non-fat-tailed distributions were comparable, we set the variance per locus to be  
185  $\tau^2 = \sigma^2/L$  when we simulated  $L$  loci, meaning the trait distribution would have constant  
186 variance  $\theta\sigma^2/2$ . Note the symmetric normal distribution is a special case of both the skew-  
187 normal distribution when the skewness parameter is zero and the  $\alpha$ -stable distribution  
188 when the “fat-tailedness” parameter is  $\alpha = 2$ .

189 For all simulations, we generated coalescent genealogies and mutations using the program  
190 `ms` (Hudson, 2002). We then generated and mapped mutational effects using custom scripts  
191 in R (R Core Team, 2013).

192 Code is available at [http://github.com/Schraiber/quant\\_trait\\_coalescent](http://github.com/Schraiber/quant_trait_coalescent).

193 [ Figure 2 goes here. ]

194 [ Figure 3 goes here. ]

195 3.4.1. *Univariate Gaussian limit.* For mutational kernels of small effect size and variance  
196  $\tau^2$  per locus, the sampling distribution converges to a normal distribution with variance  
197  $\theta\sigma^2/2$  where  $L\tau^2 \rightarrow \sigma^2$  as  $L \rightarrow \infty$ . We simulated 100 replicates of trait data for  $L \in$   
198  $\{1, 2, 4, \dots, 256\}$  and  $n \in \{2, 4, 8, \dots, 512\}$  with mutation parameters  $\theta = 2$  and  $\tau = 1$   
199 for the normal, the skew-normal (skewness=0.9), and the Laplace distributions. We then  
200 assessed convergence to the normal limit using the Kolmogorov-Smirnov (KS) test statistic,  
201  $D$ , which equals zero when two distributions are identical. Figure 2 reports the frequency  
202 we reject the null hypothesis—that the limiting and sampled distributions are identical—  
203 for each batch of 100 replicates per value of  $n$  and  $L$  for  $p$ -values less than 0.05. For  
204  $n \leq 4$ , the KS test lacked power to reject the null hypothesis whatsoever. For  $n \geq 8$ , the  
205 three mutational kernels converge to the limiting normal distribution in a similar fashion,  
206 with the sampling and limiting distributions bearing strong resemblance when  $L > 16$ .  
207 Distinctly, the Laplace distribution converges to normality at a slower rate than other  
208 mutational kernels, likely resulting from it being leptokurtic (Figure 3).

209 [ Figure 4 goes here. ]

210 3.4.2. *Central moments.* We assessed the signature left by various mutational kernels on  
211 the sampling distribution by computing the central moments across simulation replicates.  
212 While the variance ( $h_2$ ) remains constant for all values of  $L$  regardless of the mutational  
213 kernel (by experimental design), the third central moment ( $h_3$ ) and the fourth central  
214 moment ( $h_4$ ) depend on the mutational kernel for small values of  $L$ . As  $L \rightarrow \infty$ , the  
215 sample moments converge to those of a normal distribution. Here, we characterize the  
216 deviation from the normally-distributed moments under a variety of mutational kernels:  
217 the (symmetric) normal distribution; the skew-normal distribution for skewnesses 0.1, 0.5  
218 and 0.9; and the Laplace distribution. We omitted the  $\alpha$ -stable distribution from this



219 portion of the study since its moments  $h_2$ ,  $h_3$ , and  $h_4$  only exist when  $\alpha = 2$ , i.e. when it  
220 is Gaussian.

221 We simulated data while varying the number of loci,  $L \in \{1, 2, 4, \dots, 256\}$ , holding  
222 the sample size constant,  $n = 1024$ , for 2000 replicates for each of the five mutation  
223 kernels. Afterwards, we computed the mean  $h_2$ ,  $h_3$ , and  $h_4$  statistics across replicates of  
224 each mutation kernel and value of  $L$  for comparison with their expected  $h$ -statistic values  
225 (Figure 4). As expected,  $h_2$  remains constant regardless of the mutation kernel or  $L$ . The  
226 normal and Laplace distributions are symmetric and produce sample  $h_3$  values near zero,  
227 indicating no skewness. The skew-normal mutation kernel result in non-zero skewness  
228 even for traits controlled by over 100 loci so long as the kernel is sufficiently strongly  
229 skewed. The speed the sampling distribution's third central moment,  $h_3$ , converges to  
230 zero in inverse proportion to the magnitude of its mutational kernel's skewness value. All  
231 distributions produce non-zero  $h_4$  values when  $L$  is small, due to the randomness of the  
232 mutation process. The  $h_4$  value of the Laplace distribution, the sole leptokurtic mutational  
233 kernel in this comparison, is the slowest of all kernels to converge to the normal limit.

234 [ Figure 5 goes here. ]

235 3.4.3. *Multimodality.* As  $n \rightarrow \infty$  and  $L \rightarrow \infty$ , we proved that sampling distributions  
236 generated by finite-variance mutational kernels converge to the unimodal normal distri-  
237 bution and conjectured that power-law mutational kernels, such as the  $\alpha$ -stable, converge  
238 to multimodal stable distributions. Here, we demonstrate by simulation our proven and  
239 conjectured modality results hold as  $L \rightarrow \infty$ .

240 To do so, we test for unimodality using the dip statistic,  $D$  (Hartigan and Hartigan,  
241 1985). Briefly,  $D(F_0, F_1)$  gives the minimized maximum difference between an empirical  
242 distribution,  $F_1$ , and some unimodal (null) distribution,  $F_0$ , where  $F_0$  is typically taken  
243 to be the uniform distribution.  $D$  approaches zero when  $F_1$  is unimodal and equals  $\frac{1}{4}$   
244 when the distribution is perfectly bimodal (i.e. two point masses). We used the R package  
245 `dipTest` (Maechler and Ringach, 2012) to compute  $p$ -values for each simulated dataset,  
246 recording the frequency of replicates whose  $p$ -value is less than 0.05 for each mutational  
247 kernel and value of  $L$ . If the limiting distribution is unimodal, we expect this frequency to  
248 be less than 0.05 as  $L$  increases. Conversely, we expect multimodal limiting distributions  
249 to converge in frequency to some value greater than 0.05 as  $L$  increases.

250 We complemented the simulated data from Section 3.4.2 with three additional  $\alpha$ -stable  
251 mutational kernels for  $\alpha \in \{1.5, 1.7, 1.9\}$ , keeping the coalescent-mutation process variance  
252 equal across all datasets.

253 Figure 5 shows the trait distributions under  $\alpha$ -stable mutation kernels remained mul-  
254 timodal as  $L \rightarrow \infty$  and stratify according to their respective  $\alpha$  values: as  $\alpha$  decreases  
255 the large-effect mutations responsible for multimodality grow more prominent. Mutation  
256 kernels of small effect size become unimodal as  $L \rightarrow \infty$ . Notably, Laplace-distributed mu-  
257 tations converge to unimodality more slowly the normally-distributed mutations, echoing  
258 the results reported in Sections 3.4.1 and 3.4.2. Also note that when the number of loci



259 is small ( $L \leq 4$ ) the sampling distribution is multimodal regardless of the mutation ker-  
260 nel. This corroborates our earlier KS tests (Section 3.4.1), which found simulated data for  
261  $L \leq 4$  bore little to no resemblance to a unimodal normal distribution.

262

#### 4. DISCUSSION

263 The natural world is replete with quantitative trait variation and understanding the  
264 forces governing their evolution is a central goal of evolutionary biology. The model of  
265 Fisher (1918), which explained how quantitative variation can be generated by Mendelian  
266 inheritance, provides an underpinning for understanding the generation and maintenance of  
267 variation in continuous characters. A primary assumption of much of this work is traits are  
268 controlled by a large number of loci and that new mutations have a very small, symmetric  
269 effect on the trait value.

270 In this work, we introduced a coalescent framework for modeling neutral evolution in  
271 quantitative traits. This stands in contrast to past work, which has typically taken a  
272 forward-in-time approach based on classical population genetics (but see Whitlock (1999)  
273 who also utilized a coalescent model). Our backward-in-time, sample-focused approach  
274 enabled us to derived an expression for the joint distribution of the data with arbitrary  
275 mutational effects and numbers of loci. We found that traits governed by a large number  
276 of loci with small effects are well-modeled by a Gaussian distribution, as expected. How-  
277 ever, we saw that with small numbers of loci, significant departures from normality can  
278 be observed. Moreover, for fat-tailed (or power-law) mutational kernels, there are signifi-  
279 cant departures from normality (including multi-modality), even when the number of loci  
280 becomes large.

281 We assessed departure from normality in traits governed by a small number of loci by  
282 exploring the central moments of three different mutational kernels (normal, skew-normal  
283 and Laplace distributions) both analytically and by simulation. We showed that although  
284 all three mutational kernels converge to a Gaussian distribution, traits controlled by a  
285 small number of loci retain the signature of their underlying mutational kernel in their  
286 3rd and 4th central moments. Hence, it may be possible to reconstruct aspects of the  
287 mutational effect distribution by observing phenotypes in natural populations. This may  
288 be particularly interesting for analyzing variation in gene expression, because mutational  
289 effects in *cis* may be strongly skewed (Khaitovich et al., 2005a; Chaix et al., 2008; Gruber  
290 et al., 2012). Our theory suggests that the distribution of gene expression in a population  
291 might therefore be skewed.

292 We were also interested in the circumstances under which multi-modal phenotypic dis-  
293 tributions can arise. When a trait has a simple genetic architecture, it's easy to see that  
294 there must be discrete phenotypic clusters, corresponding to groups of individuals sharing  
295 the same mutations. As the number of loci increases, there are more mutational targets  
296 (and thus more mutation events), which smooths the distribution, causing the sampling  
297 distribution to converge to the appropriate limiting distribution. For mutational effects  
298 with finite variance, this ultimately results in a limiting Gaussian distribution, consistent  
299 with the central limit theorem. However, when the mutational kernel is fat-tailed, the

300 marginal effects of each locus do not vanish as the number of loci grows. Thus, some  
301 clade-specific mutations will always be of large effect despite the number of loci assumed  
302 by the model, resulting in a multi-modal sampling distribution.

303 These results show that even under the assumption of neutrality, significant departures  
304 from normality are possible, and may be conflated with signatures of selection acting  
305 on quantitative variation. Several recent studies have claimed that evidence of non-  
306 Gaussianity may be evidence for non-neutral evolution at macroevolutionary time scales.  
307 For instance, Khaitovich et al. (2005a); Chaix et al. (2008) found that the distribution  
308 of gene expression differences between great apes is strongly positively skewed. Similarly,  
309 Uyeda et al. (2011) argued that there is a one million year wait between bursts of evolution  
310 in the fossil record and numerous studies have explored non-Gaussian trait divergence in a  
311 phylogenetic context (Landis et al., 2013; Eastman et al., 2013). While it is unlikely that  
312 the population genetic model we developed can be directly applied to macroevolutionary  
313 data of this sort (Estes and Arnold, 2007), it is important to recognize that such effects  
314 can be due to purely neutral processes.

315 On shorter time scales, there is significant interest in detecting non-neutral quantitative  
316 trait evolution among closely related species or populations. One powerful method compares  
317 a measure of quantitative trait divergence,  $Q_{st}$ , to the fixation index,  $F_{st}$  (McKay and  
318 Latta, 2002; Ovaskainen et al., 2011). However, this requires estimates of breeding values  
319 from common-garden experiments, and may be difficult to achieve. In other cases (e.g.  
320 Lemos et al. (2005)) more phenomenological approaches are taken, by comparing within  
321 and between species phenotypic diversity. The null distributions of these approaches typically  
322 rely on assumptions of the infinitesimal model, which we have shown may be violated  
323 due to mutations of large effect and/or loci with relatively simple genetic bases. To address  
324 these issues and leverage the abundance of modern quantitative trait data, Berg and Coop  
325 (2014) developed a method that explicitly uses breeding values estimated from quantitative  
326 trait mapping studies. When such effect size estimates are unavailable, it may be possible  
327 to use our formalism to develop robust null models to detect selection.

328 Our coalescent approach can be extended in several ways. Notably, we consider only  
329 haploid populations. In principle, an extension to diploid individuals is straight-forward  
330 using the result of Möhle (1998) that diploid, dioecious populations of size  $N$  are readily  
331 modeled by pairing random chromosomes from a haploid population of size  $2N$ . To incorporate  
332 diploidy, we would also need to incorporate a model of dominance, of which several  
333 exist in the literature (e.g. the model of independent dominance of Lynch and Hill (1986)).

334 From the point of view of the coalescent process, it is straightforward to apply our model  
335 to populations that have undergone complex demographic histories. This is because the  
336 dynamics of a coalescent under population size fluctuations and population structure are  
337 well known. Moreover, we explored only unlinked, neutral loci and it may be possible  
338 to obtain some analytical results for linked loci and/or weak natural selection by using  
339 the ancestral recombination graph and ancestral selection graph, respectively. While analytical  
340 results are difficult within these frameworks, we believe that they can be used  
341 to perform simple simulations of quantitative traits evolving in complex scenarios, thus  
342 enabling Approximate Bayesian Computation.

343

5. APPENDIX

344 **5.1. Compound Poisson processes.** To obtain the probability of the data under this  
 345 model, we must be able to compute the probability of the change in phenotype along a  
 346 branch of the tree. Unfortunately, except for very simple mutational models, this probabili-  
 347 ty is impossible to compute analytically. Instead, we compute the characteristic function  
 348 of the change along a branch.

349 Using standard results for compound Poisson processes (Kingman, 1992), we see that  
 350 the characteristic function of the change along a branch of length  $t$  (in coalescent units) is

$$(3) \quad \varphi_t(k) = e^{\frac{\theta}{2}t(\psi(k)-1)}$$

351 where  $\psi$  is the characteristic function of the mutational effect distribution.

**5.2. The phenotype at the root of the sample genealogy and the subsequent evolution within the sample are subindependent.** Note that

$$\begin{aligned} \lambda_n(\mathbf{k}) &= \mathbb{E}(e^{i\mathbf{k}^T \mathbf{X}}) \\ &= \mathbb{E}(e^{i(k_1 X_1 + k_2 X_2 + \dots + k_n X_n)}) \\ &= \mathbb{E}(e^{i(k_1(\mathcal{R} + \mathcal{E}_1) + k_2(\mathcal{R} + \mathcal{E}_2) + \dots + k_n(\mathcal{R} + \mathcal{E}_n))}) \end{aligned}$$

where  $\mathcal{R}$  is the phenotype at the root of the sample genealogy and  $\mathcal{E}_u$  is the subsequent evolution leading to lineage  $u$  in the sample. So,

$$\begin{aligned} \mathbb{E}(e^{i(k_1(\mathcal{R} + \mathcal{E}_1) + k_2(\mathcal{R} + \mathcal{E}_2) + \dots + k_n(\mathcal{R} + \mathcal{E}_n))}) &= \mathbb{E}_{\mathcal{R}}(\mathbb{E}(e^{i(k_1(\mathcal{R} + \mathcal{E}_1) + k_2(\mathcal{R} + \mathcal{E}_2) + \dots + k_n(\mathcal{R} + \mathcal{E}_n))} | \mathcal{R})) \\ &= \mathbb{E}_{\mathcal{R}}(e^{i(k_1 + k_2 + \dots + k_n)\mathcal{R}} \mathbb{E}(e^{i(k_1 \mathcal{E}_1 + k_2 \mathcal{E}_2 + \dots + k_n \mathcal{E}_n)} | \mathcal{R})) \\ &= \mathbb{E}(e^{i(k_1 + k_2 + \dots + k_n)\mathcal{R}}) \mathbb{E}(e^{i(k_1 \mathcal{E}_1 + k_2 \mathcal{E}_2 + \dots + k_n \mathcal{E}_n)}) \end{aligned}$$

352 where the last line follows by independent and stationary increments of the compound  
 353 Poisson process. Thus,  $\mathcal{R}$  and  $(\mathcal{E}_1, \mathcal{E}_2, \dots, \mathcal{E}_n)$  subindependent, and hence their joint char-  
 354 acteristic function is the product of their characteristic functions.

**5.3. Proof of recursive formula for the characteristic function.** First, we condition on the state at the first coalescence (going back in time). The state consists of three components: 1) which pair of individuals coalesce,  $(u, v)$ , 2) the time of the coalescent event,  $T_c$ , and 3) the trait value in each lineage at that time,  $\mathbf{X}'$  (note that, given  $(u, v)$ , we have that  $X'_u = X'_v$ , since those two lineages have coalesced and hence had the same

trait value at the time of coalescence). Then,

$$\begin{aligned}
 \mathbb{E}(e^{i\mathbf{k}^T \mathbf{X}}) &= \mathbb{E}_{(u,v), \mathbf{X}', T_c} \left( \mathbb{E} \left( e^{i\mathbf{k}^T \mathbf{X}} | (u,v), \mathbf{X}', T_c \right) \right) \\
 &= \frac{2}{n(n-1)} \sum_{u < v} \mathbb{E}_{\mathbf{X}', T_c} \left( \mathbb{E} \left( e^{i\mathbf{k}^T \mathbf{X}} | (i,j), \mathbf{X}', T_c \right) \right) \\
 &= \frac{2}{n(n-1)} \sum_{u < v} \mathbb{E}_{\mathbf{X}', T_c} \left( \mathbb{E} \left( e^{i\mathbf{k}^T (\mathbf{X}' + \mathbf{Y}(T_c))} | (u,v), \mathbf{X}', T_c \right) \right) \\
 (4) \quad &= \frac{2}{n(n-1)} \sum_{u < v} \mathbb{E}_{\mathbf{X}', T_c} \left( e^{i\mathbf{k}^T \mathbf{X}'} \mathbb{E} \left( e^{i\mathbf{k}^T \mathbf{Y}(T_c)} | T_c \right) \right)
 \end{aligned}$$

355 where  $\mathbf{Y}(t) = (Y_1(t), Y_2(t), \dots, Y_n(t))$  is the vector accounting for the evolution on each  
 356 lineage that occurs during time  $t$ . The second line follows by the fact that each pair  
 357 is equally likely to coalesce (with probability  $\binom{n}{2}^{-1}$ ) and the third line by independent  
 358 increments of a compound Poisson process.

359 Now, we compute the internal expectation going forward in time. Noticing that  $\mathbb{E}(e^{i\mathbf{k}^T \mathbf{Y}(T_c)} | T_c)$   
 360 is simply the characteristic function of a compound Poisson process run for length  $T_c$ , we  
 361 see from (3) that

$$\mathbb{E} \left( e^{i\mathbf{k}^T \mathbf{Y}(T_c)} | T_c \right) = \exp \left\{ \frac{\theta}{2} T_c \left( \sum_{i=1}^n \psi(k_i) - n \right) \right\}.$$

362 Because  $T_c$  and  $\mathbf{X}'$  are independent, we can integrate over  $T_c$  analytically in the outer  
 363 expectation. The distribution of the time to the first coalescent event in a sample of size  
 364  $n$  is Exponential with rate  $\binom{n}{2}$ , hence,

$$\mathbb{E}_{T_c} \left( \exp \left\{ \frac{\theta}{2} T_c \left( \sum_{i=1}^n \psi(k_i) - n \right) \right\} \right) = \frac{n(n-1)}{n(n-1) - \theta \left( \sum_{i=1}^n \psi(k_i) - n \right)}.$$

365 Plugging this result into (4) results in

$$\mathbb{E} \left( e^{i\mathbf{k}^T \mathbf{X}} \right) = \frac{2}{n(n-1) - \theta \left( \sum_{i=1}^n \psi(k_i) - n \right)} \sum_{u < v} \mathbb{E}_{\mathbf{X}'} \left( e^{i\mathbf{k}^T \mathbf{X}'} \right),$$

366 but since  $\mathbf{X}'$  is simply the result of the same process where two of the entries are identical,  
 367 we obtain the recursive formula (1).

368 To initialize the recursion, we must compute the characteristic function for a sample of  
 369 size 2. This is

$$(5) \quad \phi_2(\mathbf{k}) = \frac{2}{2 - \theta(\psi(k_1) + \psi(k_2) - 2)}.$$

370 **5.4. The phenotype at the root of the sample genealogy.** First, we note that,  
 371 conditional on the time between when the sample genealogy finds a common ancestral and

372 the population genealogy finds a common ancestor,  $\Delta$ , the characteristic function of the  
 373 phenotype at the root of the sample genealogy is

$$e^{\frac{\theta}{2}(\psi(k)-1)\Delta},$$

374 by using equation (3). Thus, the after integrating over  $\Delta$ , the desired quantity is *moment*  
 375 *generating function* of  $\Delta$ , defined by

$$M(z) = \mathbb{E}(e^{z\Delta})$$

376 evaluated as  $z = \frac{\theta}{2}(\psi(k) - 1)$ .

377 We compute  $M(z)$  by conditioning on how many lineages are left in the population  
 378 genealogy when the sample reaches its most recent common ancestor. To do this, we make  
 379 use of a result of Saunders et al. (1984),

$$\mathbb{P}(u \text{ lineages left in population} | \text{sample coalesced}) = n!(n-1) \frac{u!}{(n+u)!}.$$

Given that  $u$  lineages are left in the population when the sample reaches its most recent common ancestor, the remaining time until the whole population reaches its common ancestor is simply the time it takes for a coalescent started with  $u$  to reach its most recent common ancestor,  $C_u$ . Thus,

$$\begin{aligned} M(z) &= \mathbb{E}(e^{z\Delta}) \\ &= \mathbb{E}_u(\mathbb{E}(e^{z\Delta} | u \text{ lineages left when sample coalesces})) \\ &= \sum_{u=1}^{\infty} \mathbb{E}(e^{zC_u}) n!(n-1) \frac{u!}{(n+u)!} \\ &= \sum_{u=1}^{\infty} \prod_{v=2}^u \frac{v(v-1)}{v(v-1) - 2z} n!(n-1) \frac{u!}{(n+u)!} \end{aligned}$$

380 where the final line follows by recognizing that  $C_u$  is the sum of  $u - 1$  independent ex-  
 381ponential random variables with means  $\binom{u}{2}, \binom{u-1}{2}, \dots, \binom{2}{2}$ . Substituting  $\frac{\theta}{2}(\psi(k) - 1)$  for  $z$   
 382 yields the desired result.

**5.5. Computing sample central moments.** While it is difficult to compute the expectation of any sample central moments for a particular sample, it is possible to average over replicate populations to compute expectations. This results in

$$\begin{aligned} \mathbb{E}(h_2) &= \mathbb{E}(X_1^2) - \mathbb{E}(X_1 X_2) \\ \mathbb{E}(h_3) &= \mathbb{E}(X_1^3) + 2\mathbb{E}(X_1 X_2 X_3) - 3\mathbb{E}(X_1^2 X_2) \\ \mathbb{E}(h_4) &= \mathbb{E}(X_1^4) + 6\mathbb{E}(X_1^2 X_2 X_3) - 4\mathbb{E}(X_1^3 X_2) - 3\mathbb{E}(X_1 X_2 X_3 X_4), \end{aligned}$$

383 where the expectations on the right hand sides are over the *correlated* phenotypes in the  
 384 sample. It is possible to compute these expectations by taking derivatives of the char-  
 385acteristic function (1). After simplifying, one then arrives at the formulas in the main  
 386 text.

387 **5.6. Derivation of multivariate stable limit for sample distribution.** Recall that a  
 388 random variable  $X$  is said to have a fat-tailed (or power-law) distribution if

$$(6) \quad P(X > x) \sim \kappa x^{-\alpha}$$

389 for large  $x$  and some  $\kappa > 0$ . As is typical in the literature, we reserve the term “fat-tailed”  
 390 for distributions with  $\alpha \in (0, 2)$ .

391 To obtain an appropriate scaling limit, we assume that there is a parameter  $t$ , related  
 392 to the parameter  $\kappa$  in (6) by

$$(7) \quad t = \kappa \frac{\pi}{\sin(\alpha\pi/2)\Gamma(\alpha)\alpha},$$

393 such that  $Lt \rightarrow s$  as  $n \rightarrow \infty$ . The parameter  $s$  is related to the scale parameter of the  
 394 resulting limit distribution.

395 We provide a heuristic derivation, rather than a rigorous proof. First, we argue by  
 396 induction that the (per locus) characteristic function for a sample of size  $n$  is

$$\tilde{\phi}_n(\mathbf{k}) \sim 1 - \frac{\theta s}{L} \left( \sum_{\mathbf{j} \in \mathcal{P}^*(\mathbf{k})} c_{n,|\mathbf{j}|} \left| \sum_{z \in \mathbf{j}} z \right|^\alpha \right)$$

397 for large  $L$ , where  $\mathcal{P}^*(\mathbf{k})$  is the power set of the elements in  $\mathbf{k}$ , *except* the set  $\{k_1, k_2, \dots, k_n\}$ ,  
 398 and  $c_{n,|\mathbf{j}|}$  is a combinatorial constant that depends only on the sample size  $n$  and  $|\mathbf{j}|$ , the  
 399 size of the set  $\mathbf{j}$ .

Note that for  $n = 2$ , this can be seen by observing that for large  $L$ , the characteristic  
 function of a fat-tailed distribution is asymptotically

$$\begin{aligned} \psi(k) &\sim 1 - \frac{s}{L}|k| \\ &\equiv \tilde{\psi} \end{aligned}$$

Thus,

$$\begin{aligned} \phi_2(\mathbf{k}) &\sim 1 - \frac{\theta s}{2L} (|k_1|^\alpha + |k_2|^\alpha) \\ &\equiv \tilde{\phi}_2 \end{aligned}$$

Now, assume that the formula holds for  $\tilde{\phi}_{n-1}$ . Using the recursion (1), we have

$$\begin{aligned} \phi_n(\mathbf{k}) &\sim \frac{1}{\binom{n}{2} - \frac{\theta}{2} \left( \sum_{u=1}^n \tilde{\psi}(k_u) - n \right)} \sum_{u < v} \tilde{\psi}_{n-1}(\mathbf{k}^{(u,v)}) \\ &= \frac{\binom{n}{2} - \frac{\theta s}{L} \left( \sum_{\mathbf{j} \in \mathcal{P}^*(\mathbf{k})} \tilde{c}_{n,|\mathbf{j}|} \left| \sum_{z \in \mathbf{j}} z \right|^\alpha \right)}{\binom{n}{2} + \frac{\theta s}{2L} \left( \sum_{u=1}^n |k_u|^\alpha \right)}. \end{aligned}$$

The second line follows from plugging  $\tilde{\psi}$  and  $\tilde{\phi}$ , and  $\tilde{c}_{n,|\mathbf{j}|}$  arises by summing over the  
 appropriate terms coming from all characteristic functions in the sum. Again looking for



an asymptotic for large  $L$ , we see that

$$\begin{aligned} \frac{\binom{n}{2} - \frac{\theta s}{L} \left( \sum_{\mathbf{j} \in \mathcal{P}^*(\mathbf{k})} \tilde{c}_{n,|\mathbf{j}|} \left| \sum_{z \in \mathbf{j}} z \right|^\alpha \right)}{\binom{n}{2} + \frac{\theta s}{2L} \left( \sum_{u=1}^n |k_u|^\alpha \right)} &\sim 1 - \frac{\theta s}{\binom{n}{2} L} \left( \sum_{\mathbf{j} \in \mathcal{P}^*(\mathbf{k})} \tilde{c}_{n,|\mathbf{j}|} \left| \sum_{z \in \mathbf{j}} z \right|^\alpha + \frac{1}{2} \sum_{u=1}^n |k_u|^\alpha \right) \\ &= 1 - \frac{\theta s}{L} \left( \sum_{\mathbf{j} \in \mathcal{P}^*(\mathbf{k})} c_{n,|\mathbf{j}|} \left| \sum_{z \in \mathbf{j}} z \right|^\alpha \right) \\ &= \tilde{\phi}_n(\mathbf{k}). \end{aligned}$$

400 Finally, we note that by raising  $\tilde{\phi}_n$  to the  $L$ th power, and taking the limit as  $L \rightarrow \infty$ ,  
401 we obtain the log characteristic function

$$(8) \quad \log \Phi_n(\mathbf{k}) = \theta s \left( \sum_{\mathbf{j} \in \mathcal{P}^*(\mathbf{k})} c_{n,|\mathbf{j}|} \left| \sum_{z \in \mathbf{j}} z \right|^\alpha \right),$$

402 where all terms are defined as before.

403 The characteristic function in (8) can be recognized to be that of a multivariate  $\alpha$ -stable  
404 distribution (Press, 1972). These multivariate distributions are fat-tailed generalizations  
405 of the familiar multivariate normal distribution, and this limit corresponds to a generalized  
406 multivariate central limit theorem for sums of random vectors with fat-tailed distributions.

### 407 5.7. Limiting distribution of the phenotype at the root of the sample genealogy.

408 Again, we proceed heuristically rather than rigorously. First, note that for large  $L$ ,

$$\frac{v(v-1)}{v(v-1) - \theta(\psi(k) - 1)} \sim 1 - \frac{\theta s}{Lv(v-1)} |k|^\alpha$$

409 so that

$$\prod_{v=2}^u \left( 1 - \frac{\theta s}{Lv(v-1)} |k|^\alpha \right) \sim 1 - \frac{u-1}{u} \frac{s}{L} \theta |k|^\alpha$$

for large  $L$ . Thus,

$$\begin{aligned} \rho_n(k) &\sim n!(n-1) \sum_{u=1}^{\infty} \left( 1 - \frac{u-1}{u} \frac{s}{L} \theta |k|^\alpha \right) \frac{u!}{(n+u)!} \\ &= 1 - \frac{s\theta}{Ln} |k|^\alpha. \end{aligned}$$

So by definition of the exponential function, we have that

$$(9) \quad \begin{aligned} R_n(k) &= \lim_{L \rightarrow \infty} \rho_n(k)^L \\ &= e^{-\frac{s\theta}{n} |k|^\alpha}. \end{aligned}$$

410 which the characteristic function of a univariate  $\alpha$ -stable distribution, arising from the fact  
411 that the phenotype at the root of the sample genealogy is itself a limit of a sum of random

412 variables. Note that as  $n \rightarrow \infty$  (i.e. the sample becomes the whole population),  $R(k) \rightarrow 1$ ,  
413 because the root of the sample genealogy is the same as the root of the population genealogy  
414 and the root value has been specified to be equal to 0.

415 **5.8. Multivariate Gaussian limits.** For the case where the mutation distribution is not  
416 fat-tailed, we can use the multivariate central limit theorem to more efficiently derive the  
417 limiting distribution. The appropriate scaling in this case is to assume that if  $\tau^2$  is the  
418 variance of the mutation effect kernel, then  $L\tau^2 \rightarrow \sigma^2$  as  $L \rightarrow \infty$ .

419 To apply the multivariate central limit theorem, we must derive the pairwise covariances  
420 between samples. While the required covariances could be computed by taking derivatives  
421 of the characteristic function, it is more instructive to compute these moments directly.  
422 For simplicity, we assume that the mutation effect distribution has mean 0 and variance  
423  $\tau^2$ .

424 Assume that the population genealogy at a single locus,  $\mathcal{G}$ , is fixed. Noting that the  
425 variance per unit time accrued by the mutational process is  $\theta/2\tau^2$  and using the rules for  
426 calculating covariance structure on a phylogeny, it's easy to see that for samples  $i$  and  $j$   
427 we have

$$\text{Cov}(X_i, X_j | \mathcal{G}) = \begin{cases} \frac{\theta}{2}\tau^2 T & \text{if } i = j \\ \frac{\theta}{2}\tau^2 (T - T_{ij}) & \text{if } i \neq j \end{cases}$$

428 where  $T$  is the height of  $\mathcal{G}$  and  $T_{ij}$  is the height of the most recent common ancestor  
429 of samples  $i$  and  $j$ . We can then use the law of total covariance,

$$\text{Cov}(X_i, X_j) = \mathbb{E}(\text{Cov}(X_i, X_j | \mathcal{G})) + \text{Cov}(\mathbb{E}(X_i | \mathcal{G}), \mathbb{E}(X_j | \mathcal{G}))$$

430 to see that

$$\text{Cov}(X_i, X_j) = \begin{cases} \theta\tau^2 & \text{if } i = j \\ \frac{1}{2}\theta\tau^2 & \text{if } i \neq j. \end{cases}$$

431 This arises because  $\mathbb{E}(T) = 2$  and  $\mathbb{E}(T_{ij}) = 1$ .

432 Hence, as the number of loci increases to infinity in such a way that  $L\tau^2 \rightarrow \sigma^2$ , the  
433 sampling distribution converges to a multivariate normal distribution with mean 0 and  
434 variance covariance matrix  $\Sigma$  having elements

$$\Sigma_{ij} = \begin{cases} \theta\sigma^2 & \text{if } i = j \\ \frac{1}{2}\theta\sigma^2 & \text{if } i \neq j. \end{cases}$$

435 Because the pairwise covariances are equal, the random vector  $\mathbf{X}$  is an exchangeable Gauss-  
436 ian random vector. Hence, using well-known facts about the representation of exchangeable  
437 Gaussian random vectors, one arrives at the representation in the main text.

438

## 6. ACKNOWLEDGMENTS

439 We are grateful to Monty Slatkin, Anand Bhaskar and Matt Pennel for reading an earlier  
440 version of this manuscript and providing extremely detailed suggestions that significantly  
441 improved its clarity. We are also indebted to Anand Bhaskar for suggesting the forward-  
442 backward approach that led to (1).

443

REFERENCES

- 444 Aldous, D. J. 1985. Exchangeability and Related Topics. Springer.
- 445 Berg, J. J. and G. Coop. 2014. A population genetic signal of polygenic adaptation. *PLoS*
- 446 *Genetics* 10:e1004412.
- 447 Bürger, R. and R. Lande. 1994. On the distribution of the mean and variance of a quanti-
- 448 tative trait under mutation-selection-drift balance. *Genetics* 138:901–912.
- 449 Chaix, R., M. Somel, D. P. Kreil, P. Khaitovich, and G. Lunter. 2008. Evolution of primate
- 450 gene expression: drift and corrective sweeps? *Genetics* 180:1379–1389.
- 451 Chakraborty, R. and M. Nei. 1982. Genetic differentiation of quantitative characters be-
- 452 tween populations or species: I. Mutation and random genetic drift. *Genetical Research*
- 453 39:303–314.
- 454 Doebeli, M., H. J. Blok, O. Leimar, and U. Dieckmann. 2007. Multimodal pattern formation
- 455 in phenotype distributions of sexual populations. *Proceedings of the Royal Society B:*
- 456 *Biological Sciences* 274:347–357.
- 457 Eastman, J. M., D. Wegmann, C. Leuenberger, and L. J. Harmon. 2013. Simpsonian ‘evolu-
- 458 tion by jumps’ in an adaptive radiation of anolis lizards. arXiv preprint arXiv:1305.4216
- 459 .
- 460 Estes, S. and S. J. Arnold. 2007. Resolving the paradox of stasis: models with stabilizing
- 461 selection explain evolutionary divergence on all timescales. *The American Naturalist*
- 462 169:227–244.
- 463 Falconer, D. and T. Mackay. 1996. *Introduction to Quantitative Genetics*. 4 ed. American
- 464 Genetic Association.
- 465 Fisher, R. 1930. *The Genetical Theory of Natural Selection*. Clarendon Press.
- 466 Fisher, R. A. 1918. The correlation between relatives on the supposition of Mendelian
- 467 inheritance. *Transactions of the Royal Society of Edinburgh* 52:399–433.
- 468 Galton, F. 1883. *Inquiries into Human Faculty and its Development*. Macmillan.
- 469 Galton, F. 1889. *Natural Inheritance*. Macmillan.
- 470 Gruber, J. D., K. Vogel, G. Kalay, and P. J. Wittkopp. 2012. Contrasting properties of gene-
- 471 specific regulatory, coding, and copy number mutations in *Saccharomyces cerevisiae*:
- 472 frequency, effects, and dominance. *PLoS genetics* 8:e1002497.
- 473 Haldane, J. 1954. The statics of evolution. *Evolution as a Process* Pages 109–121.
- 474 Hartigan, J. A. and P. Hartigan. 1985. The dip test of unimodality. *The Annals of Statistics*
- 475 Pages 70–84.
- 476 Hudson, R. R. 2002. Generating samples under a Wright–Fisher neutral model of genetic
- 477 variation. *Bioinformatics* 18:337–338.
- 478 Khaitovich, P., I. Hellmann, W. Enard, K. Nowick, M. Leinweber, H. Franz, G. Weiss,
- 479 M. Lachmann, and S. Pääbo. 2005a. Parallel patterns of evolution in the genomes and
- 480 transcriptomes of humans and chimpanzees. *Science* 309:1850–1854.
- 481 Khaitovich, P., S. Pääbo, and G. Weiss. 2005b. Toward a neutral evolutionary model of
- 482 gene expression. *Genetics* 170:929–939.
- 483 Kimura, M. 1965. A stochastic model concerning the maintenance of genetic variability in
- 484 quantitative characters. *Proceedings of the National Academy of Sciences of the United*

- 485 States of America 54:731.
- 486 Kingman, J. F. C. 1992. Poisson Processes. 3 ed. Oxford University Press.
- 487 Kopp, M. and J. Hermisson. 2006. The evolution of genetic architecture under frequency-  
488 dependent disruptive selection. *Evolution* 60:1537–1550.
- 489 Lande, R. 1976. Natural selection and random genetic drift in phenotypic evolution. *Evo-*  
490 *lution* Pages 314–334.
- 491 Landis, M. J., J. G. Schraiber, and M. Liang. 2013. Phylogenetic analysis using Lévy  
492 processes: finding jumps in the evolution of continuous traits. *Systematic biology* 62:193–  
493 204.
- 494 Latter, B. 1960. Natural selection for an intermediate optimum. *Australian Journal of*  
495 *Biological Sciences* 13:30–35.
- 496 Latter, B. 1970. Selection in finite populations with multiple alleles. ii. Centripetal selection,  
497 mutation, and isoallelic variation. *Genetics* 66:165.
- 498 Lemos, B., C. D. Meiklejohn, M. Cáceres, and D. L. Hartl. 2005. Rates of divergence in  
499 gene expression profiles of primates, mice, and flies: stabilizing selection and variability  
500 among functional categories. *Evolution* 59:126–137.
- 501 Lynch, M. and W. G. Hill. 1986. Phenotypic evolution by neutral mutation. *Evolution*  
502 Pages 915–935.
- 503 Mackay, T., R. F. Lyman, and M. S. Jackson. 1992. Effects of P element insertions on  
504 quantitative traits in *Drosophila melanogaster*. *Genetics* 130:315–332.
- 505 Maechler, M. and D. Ringach. 2012. diptest: Hartigans dip test statistic for unimodality.
- 506 McKay, J. K. and R. G. Latta. 2002. Adaptive population divergence: markers, qtl and  
507 traits. *Trends in Ecology & Evolution* 17:285–291.
- 508 Mendel, G. 1866. Versuche über pflanzenhybriden. *Verhandlungen des naturforschenden*  
509 *Vereines in Brunn* 4: 3 44.
- 510 Möhle, M. 1998. Coalescent results for two-sex population models. *Advances in Applied*  
511 *Probability* Pages 513–520.
- 512 Ovaskainen, O., M. Karhunen, C. Zheng, J. M. C. Arias, and J. Merilä. 2011. A new method  
513 to uncover signatures of divergent and stabilizing selection in quantitative traits. *Genetics*  
514 189:621–632.
- 515 Pearson, K. 1894. Contributions to the mathematical theory of evolution. *Philosophical*  
516 *Transactions of the Royal Society of London A*. Pages 71–110.
- 517 Pearson, K. 1895. Contributions to the mathematical theory of evolution. III. Regression,  
518 heredity, and panmixia. *Proceedings of the Royal Society of London* 59:69–71.
- 519 Pearson, K. 1904. Mathematical contributions to the theory of evolution. XII. On a gener-  
520 alised theory of alternative inheritance, with special reference to Mendel’s laws. *Philo-*  
521 *sophical Transactions of the Royal Society of London A*. Pages 53–86.
- 522 Press, S. J. 1972. Multivariate stable distributions. *Journal of Multivariate Analysis* 2:444–  
523 462.
- 524 R Core Team. 2013. R: A Language and Environment for Statistical Computing. R Foun-  
525 dation for Statistical Computing Vienna, Austria.
- 526 Saunders, I. W., S. Tavaré, and G. Watterson. 1984. On the genealogy of nested subsamples  
527 from a haploid population. *Advances in Applied probability* Pages 471–491.

- 528 Uyeda, J. C., T. F. Hansen, S. J. Arnold, and J. Pienaar. 2011. The million-year wait for  
529 macroevolutionary bursts. *Proceedings of the National Academy of Sciences* 108:15908–  
530 15913.
- 531 Weldon, W. F. R. 1902. Mendel's laws of alternative inheritance in peas. *Biometrika*  
532 Pages 228–254.
- 533 Whitlock, M. C. 1999. Neutral additive genetic variance in a metapopulation. *Genetical*  
534 *research* 74:215–221.

7. FIGURES

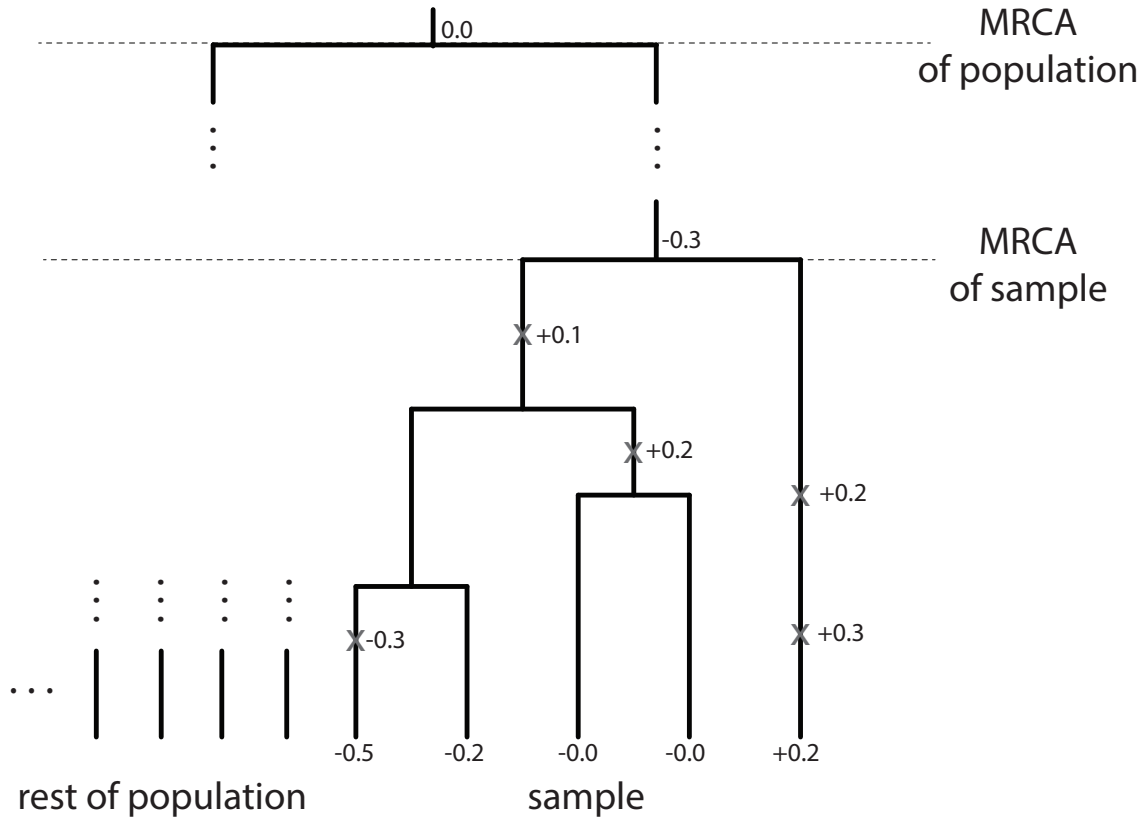

FIGURE 1. Example realization of coalescent process for a sample of size 5. Mutations (marked as light gray X's), are placed upon the genealogy representing each individual in the population. Effects of each mutation are drawn from a probability distribution and are added along each branch length. The model is specified such that the most recent common ancestor (MRCA) of the population has phenotype 0.0, while the MRCA of the population may have a phenotype different from zero, due to mutations that accumulate between the MRCA of the sample and the MRCA of the population.



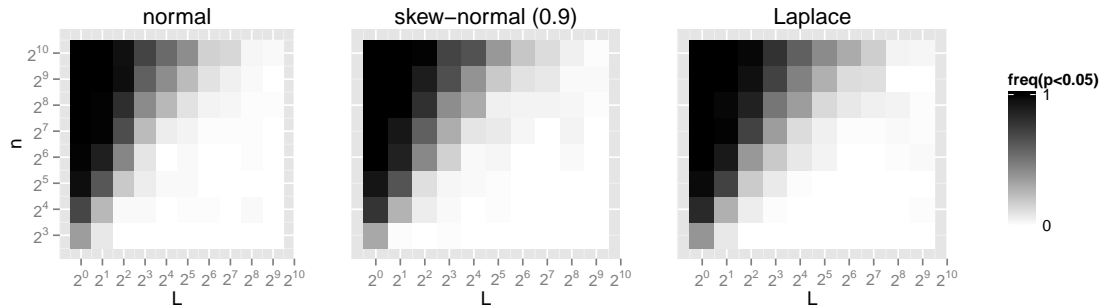

FIGURE 2. Frequency to reject normal sampling distribution. Heatmap cells correspond to number of sampled individuals,  $n$ , and number of loci,  $L$ . Panels are labeled with their respective mutational kernels. For 100 simulated replicates per cell, heatmap values correspond to the frequency the Kolmogorov-Smirnov test rejects the null hypothesis ( $p < 0.05$ ) that the sampling distribution and the limiting normal distribution are equal. White cells indicate the sampling distribution looks normal. Black cells indicate the sampling distribution does not look normal.

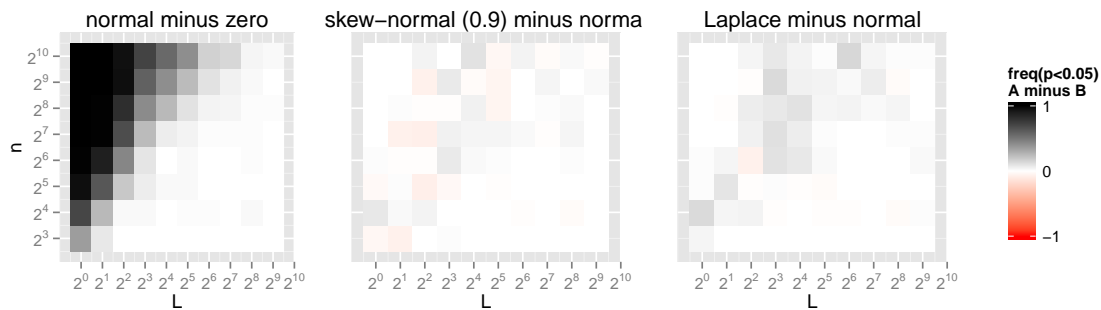

FIGURE 3. Comparison of frequency to reject normal sampling distribution. Heatmap cells correspond to number of sampled individuals,  $n$ , and number of loci,  $L$ . Panels are labeled with their respective mutational kernels. For 100 simulated replicates per cell, heatmap values correspond to the frequency the Kolmogorov-Smirnov test rejects the null hypothesis ( $p < 0.05$ ) that the sampling distribution,  $A$ , and the limiting normal distribution are equal *minus* the frequencies computed for a second distribution,  $B$ . White cells indicate both distributions report equal frequencies. Black cells indicate  $A$  looks normal more often than  $B$ . Red cells indicate  $A$  looks normal less often than  $B$ .

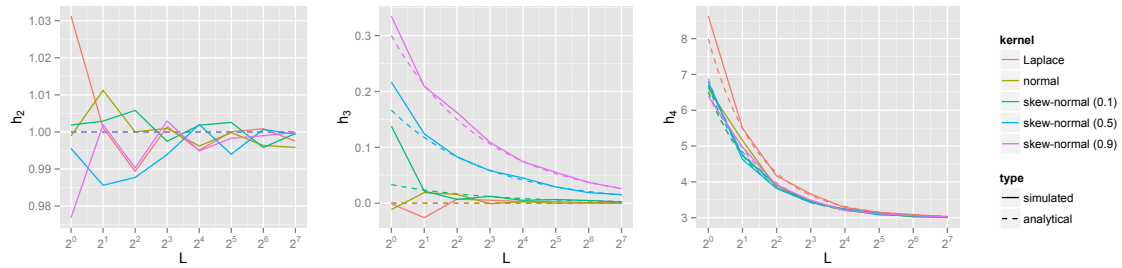

FIGURE 4. Central moments. From left to right, the panels correspond to the central moments,  $h_2$ ,  $h_3$ , and  $h_4$ , respectively, for the sampling distributions evolving under various mutational kernels. Data were simulated for 1024 sampled individuals and 2000 replicates for eight values of  $L$ , the number of loci. Colors distinguish the mutational kernel and relevant kernel parameters (if any). Solid lines correspond to moment values computed from the simulated data. Dashed lines correspond to the expected moment values.

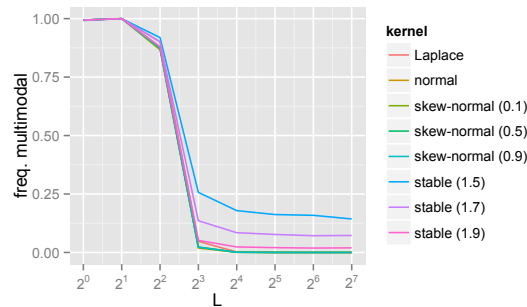

FIGURE 5. Frequency to reject unimodal sampling distribution. Solid lines report the frequency the null hypothesis of the dip-test, that the sampling distribution was unimodal, was rejected for  $p < 0.05$  when evolving under various mutational kernels. Data were simulated for 1024 sampled individuals and 2000 replicates for eight values of  $L$ , the number of loci. Colors distinguish the mutational kernel and relevant kernel parameters (if any).
